# Supplementary material for: Mesenchymal Stem Cell-Conditioned Media Regulate Steroidogenesis and Inhibit Androgen Secretion in a PCOS Cell Model via BMP-2
Source: MDPI journal article supplement (doi:10.3390/ijms22179184), 2021-08-25
Supplement: s1 [file s1]

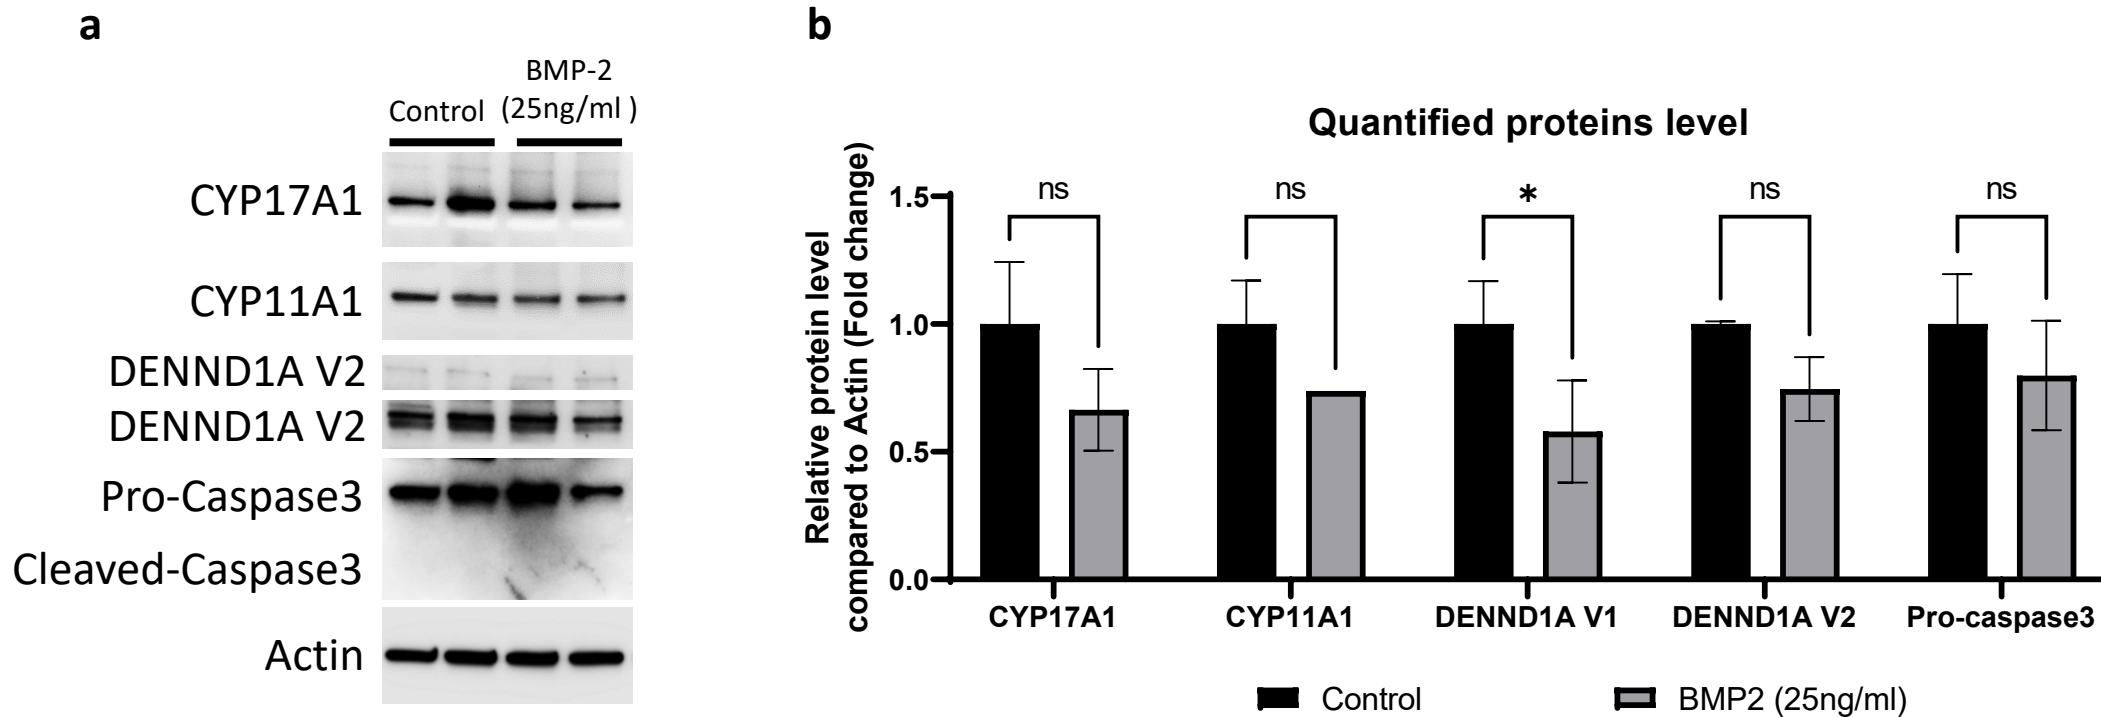

**Supplementary Figure S1. Protein expression changes in H295R cells after BMP-2 treatment.**

(a) Western blot result with CYP17A1, CYP11A1, DENND1A variant1(DENND1A V1), DENND1A variant1(DENND1A V1) and Caspase3 in control H295R cells and BMP-2 treated (25ng/ml) H295R cells. The cleaved Caspase3 were not detected in this samples. (b) Relative protein level of CYP17A1, CYP11A1, DENND1A variant1(DENND1A V1), DENND1A variant1(DENND1A V1) and Pro-Caspase3. Data presented as the mean  $\pm$  SD. (n=2, Significant level, \*:  $p < 0.05$ ; NS: Not significant).
